# Supplementary material
Source: PubMed Central journal article supplement (PMC6260789)
Supplement: NIHMS978784-supplement-Fig1.pdf [file NIHMS978784-supplement-Fig1.pdf]

**Supplementary Figure 1.**

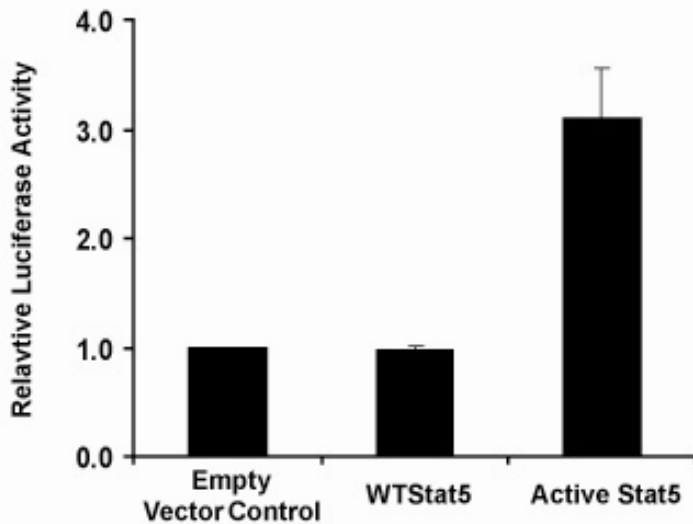

**Supplementary Figure 1.** COS-7 cells were grown at 37 °C with 5% CO<sub>2</sub> in Dulbecco's modified essential medium (DMEM) supplemented with 10% fetal calf serum, 2 mM L-glutamine and penicillin-streptomycin (50 IU/ml, 50 µg/ml, respectively). Cos-7 cells were seeded in 6-well dishes the day before transfection at a density of 1.0X10<sup>5</sup> cells per well. Cells were transfected using FuGENE 6 transfection reagent (Roche) per the manufacture's instructions at a 3:1 FuGENE:DNA ratio with plasmid DNAs expressing β-casein luciferase reporter (pZZ1, gift from Bernd Groner; Institute for Biomedical Research, Frankfurt am Main, Germany), *Renilla* reporter (pRL-TK, Promega, internal control), prolactin receptor, and either empty vector, wild-type Stat5a, or Stat5aS710F. Twenty-four hours post transfection, cells were serum starved for 16 hours, prior to harvesting in 1X passive lysis buffer (Promega). Detection of firefly and *Renilla* luciferase activity was measured using the Dual-Luciferase Reporter Assay System (Promega). The assay was performed three times in duplicate wells. Luciferase values were normalized to the empty vector control values.
