# Supplementary material
Source: PubMed Central journal article supplement (PMC6260789)
Supplement: NIHMS978784-supplement-Fig2.pdf [file NIHMS978784-supplement-Fig2.pdf]

**Supplementary Figure 2.**

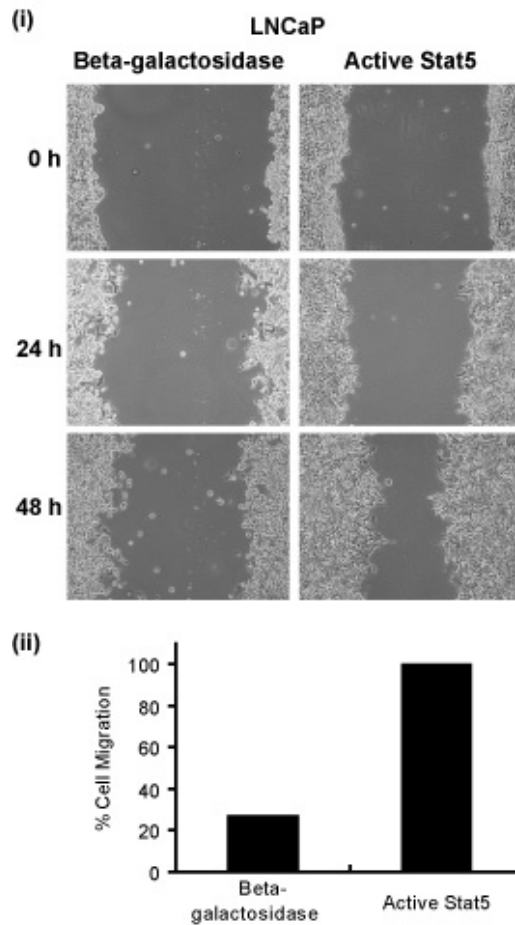

**Supplementary Figure 2. Stat5 induces migration of LNCaP human prostate cancer cells.**

LNCaP were infected with adenovirus expressing active Stat5 (Stat5aS710F) or beta-galactosidase at MOI 10, as indicated. Identical scratches were made in parallel wells (n=8) using a 1000  $\mu$ l pipette tip 24 h after the adenoviral infection. The cells were fixed, photographed, and wound sizes were measured (i-ii).
